# Supplementary material for: Estimation of ALU Repetitive Elements in Plasma as a Cost-Effective Liquid Biopsy Tool for Disease Prognosis in Breast Cancer
Source: MDPI journal article supplement (doi:10.3390/cancers15041054), 2023-02-07
Supplement: s1 [file s1]

## Supplementary figures

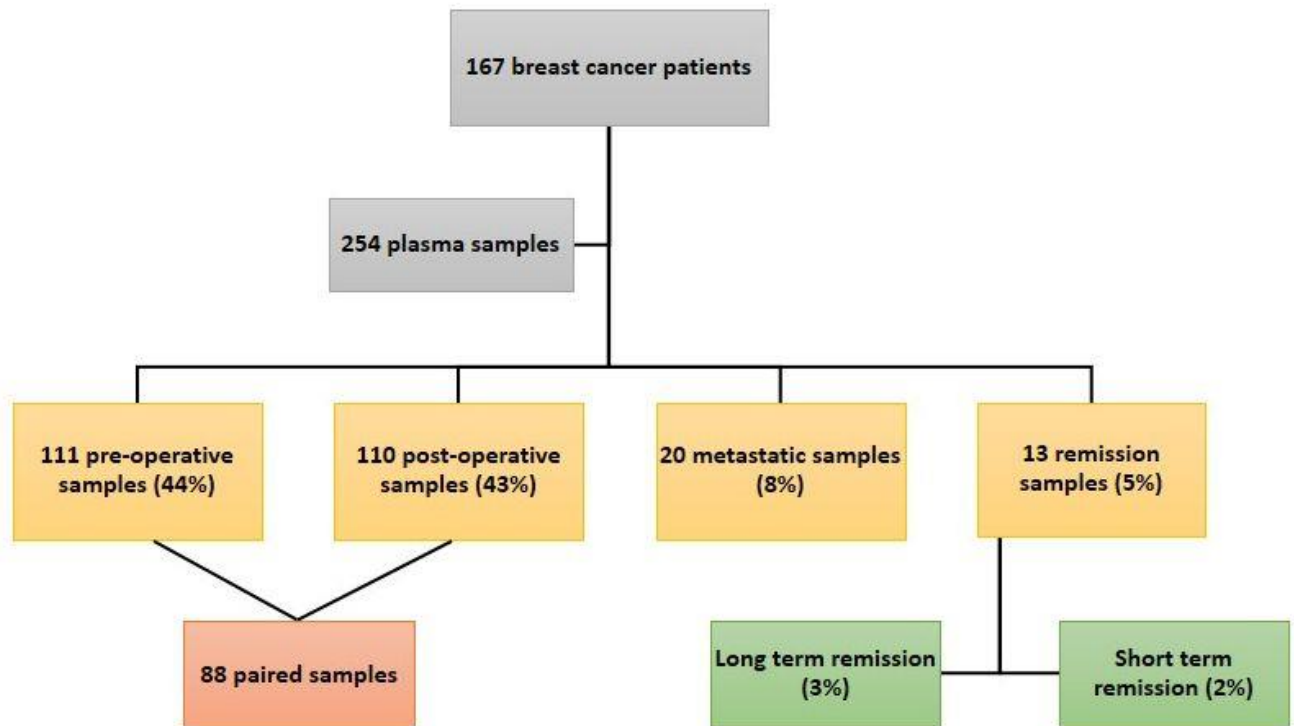

**Figure S1.** Proportion percentage of various disease groups subjected to cfDNA analysis in the study.

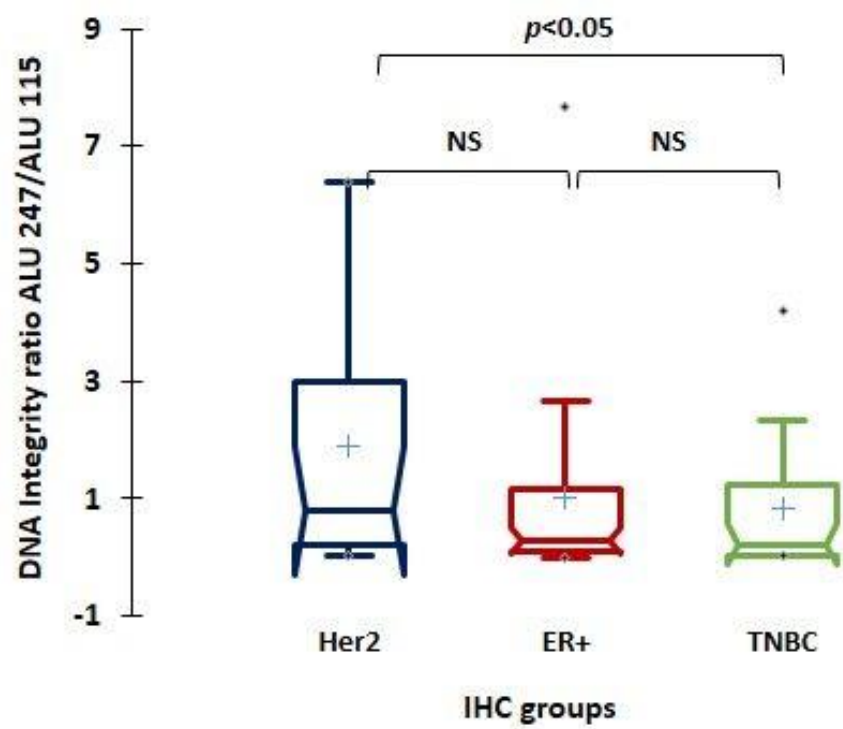

**Figure S2:** Univariate analysis depicting DNA integrity ratio between the IHC subtypes

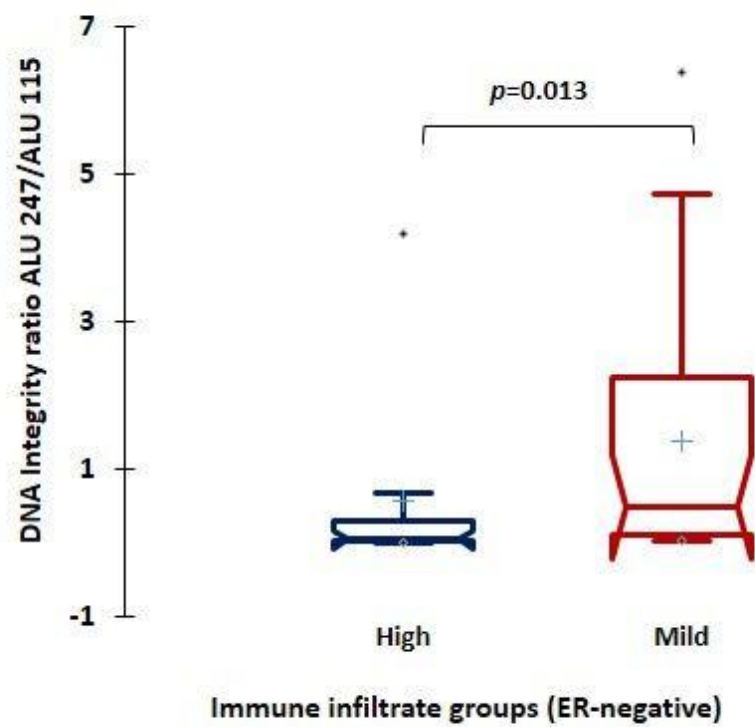

**Figure S3:** Univariate analysis depicting DNA integrity ratio between high and mild immune infiltrate groups in the ER-negative subtype

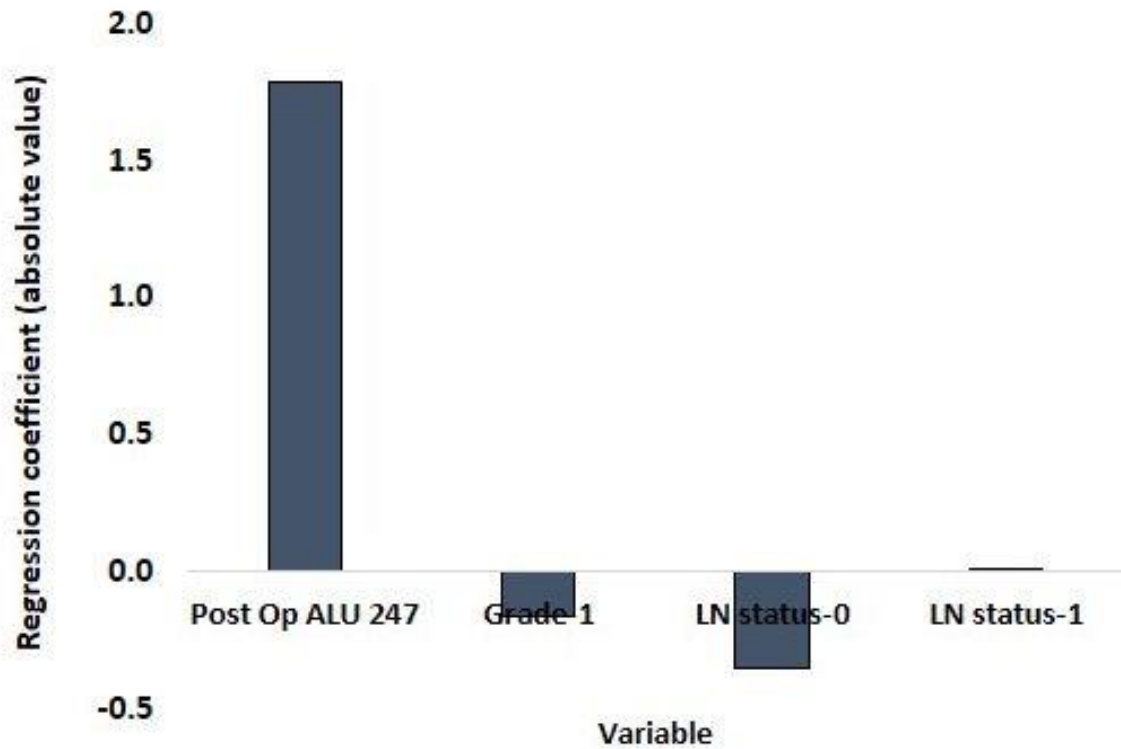

**Figure S4:** Lasso regression model analysis performed with ALU 247 and other clinical parameters. The graph represents the weightage the lasso model has assigned to the parameters in determining metastasis or death due to metastasis. Post-Op ALU 247 has the highest weightage.

**Table S1.** Primers for TP53 and PIK3CA, designed based on the guideline provided in 16S metagenomic sequencing library preparation (15044223 B) manual for NGS.

| Primer Name    | Sequences 5' to 3'                                             | Length |
|----------------|----------------------------------------------------------------|--------|
| TP53 EXON 5 FP | TCGTCGGCAGCGTCAGATGTGTATAAGAGAC<br>AGACTCTGTCTCCTTCCTCTTCCT    | 55     |
| TP53 EXON 5 RP | GTCTCGTGGGCTCGGAGATGTGTATAAGAGA<br>CAGAACCAGCCCTGTCGTCTCTTC    | 54     |
| TP53 EXON 6 FP | TCGTCGGCAGCGTCAGATGTGTATAAGAGAC<br>AGAGGGTCCCCAGGCCTCT         | 50     |
| TP53 EXON 6 RP | GTCTCGTGGGCTCGGAGATGTGTATAAGAGA<br>CAGAGCCCCCCTACTGCTCAC       | 52     |
| TP53 EXON 7 FP | TCGTCGGCAGCGTCAGATGTGTATAAGAGAC<br>AGTGGCCTCATCTTGGGCCTG       | 52     |
| TP53 EXON 7 RP | GTCTCGTGGGCTCGGAGATGTGTATAGAGAC<br>AGGGTCAGAGGCAAGCAGAGG       |        |
| TP53 EXON 8 FP | TCGTCGGCAGCGTCAGATGTGTATAAGAGAC<br>AGGGGAGTAGATGGAGCCTGGT      | 53     |
| TP53 EXON 8 RP | GTCTCGTGGGCTCGGAGATGTGTATAAGAGA<br>CAGCCGCTTCTTGTCCTGCTTGC     | 54     |
| TP53 EXON 9 FP | TCGTCGGCAGCGTCAGATGTGTATAAGAGAC<br>AGGGAGGAGACCAAGGGTGCA       | 52     |
| TP53 EXON 9 RP | GTCTCGTGGGCTCGGAGATGTGTATAAGAGA<br>CAGGGCAAATGCCCCAATTGCAGG    | 55     |
| PIK3CA FP      | TCGTCGGCAGCGTCAGATGTGTATAAGAGAC<br>AGCTGAGCAAGAGGCTTTGGAGTA    | 55     |
| PIK3CA RP      | GTCTCGTGGGCTCGGAGATGTGTATAAGAGA<br>CAGGTGCAATTCCTATGCAATCGGTCT | 58     |

**Table S2.** Clinical characteristics of patients: Clinico-pathological characteristics of (n=132) patients with primary tumors

|                          | <b>n = 132 patients (%)</b> |
|--------------------------|-----------------------------|
| <b>Age</b>               |                             |
| Mean (Yrs)               | 56                          |
| Median (Yrs)             | 56                          |
|                          |                             |
| <b>Tumor Size</b>        |                             |
| Mean (cm)                | 3.6                         |
| Median (cm)              | 3                           |
|                          |                             |
| <b>Stage</b>             |                             |
| I                        | 21 (18)                     |
| II                       | 59(50)                      |
| III                      | 37 (32)                     |
|                          |                             |
| <b>Grade</b>             |                             |
| 0&1                      | 24 (19)                     |
| 2                        | 71 (55)                     |
| 3                        | 27 (21)                     |
| NA                       | 6 (5)                       |
|                          |                             |
| <b>Menopausal status</b> |                             |
| Pre                      | 33 (26)                     |
| Post                     | 96 (74)                     |
|                          |                             |
| <b>Lymph node status</b> |                             |
| Positive                 | 53 (42)                     |
| Negative                 | 72 (58)                     |
|                          |                             |
| <b>Estrogen Receptor</b> |                             |
| Positive                 | 77 (61)                     |
| Negative                 | 50 (39)                     |
|                          |                             |
|                          |                             |
| <b>HER2</b>              |                             |
| Positive                 | 19 (15)                     |
| Negative                 | 103 (81)                    |
| Equivocal                | 5 (4)                       |
